# Supplementary material
Source: PubMed Central journal article supplement (PMC3793617)
Supplement: supp_M042457_jlr.M042457-2.pdf [file supp_M042457_jlr.M042457-2.pdf]

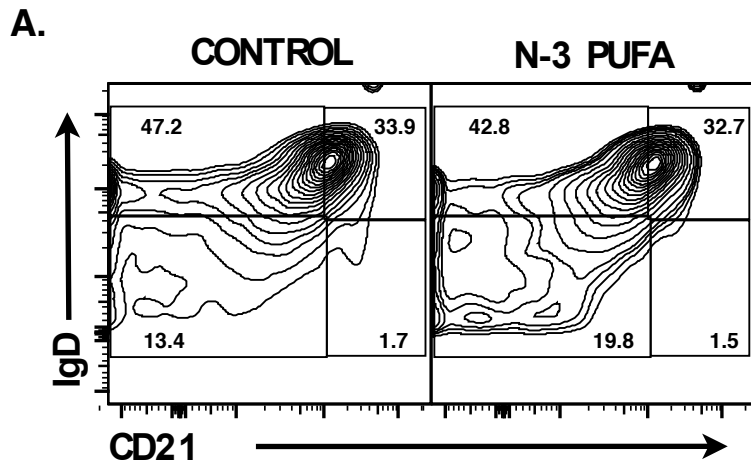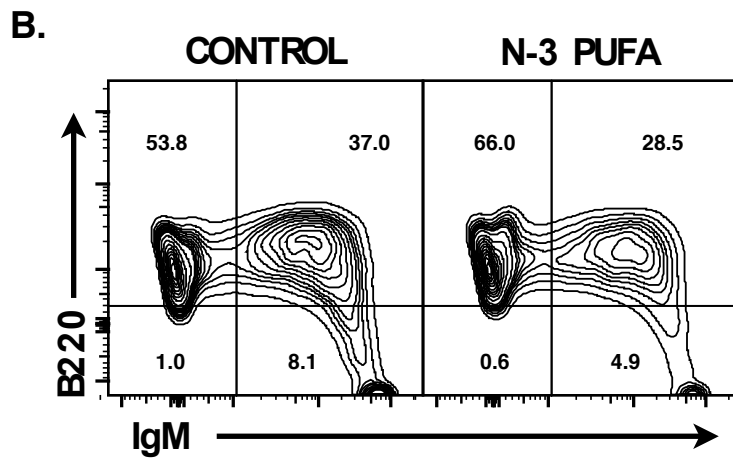

**SUPPLEMENTAL FIGURE 2: Sample contour plots of splenic B cells and bone marrow from control and n-3 PUFA fed mice. (A) Gating strategy for B220<sup>+</sup>IgM<sup>+</sup> splenic B cells and (B) CD19<sup>+</sup> bone marrow cells.**
