# Supplementary material
Source: PubMed Central journal article supplement (PMC3793617)
Supplement: supp_M042457_jlr.M042457-3.pdf [file supp_M042457_jlr.M042457-3.pdf]

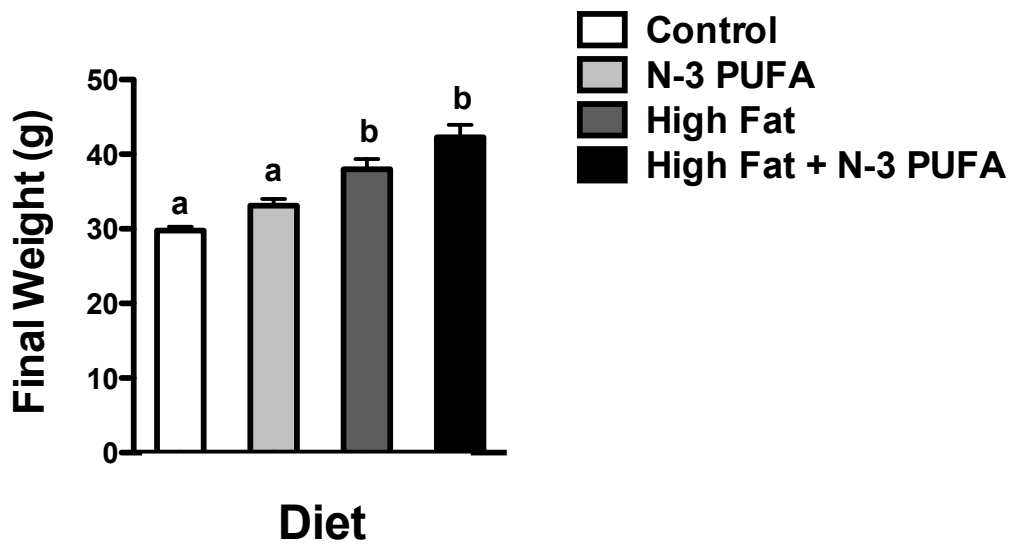

**SUPPLEMENTAL FIGURE 3: High fat and high fat + n-3 PUFA diets increased body weight.** Final weight of mice consuming control, n-3 PUFA, high fat or high fat + n-3 PUFA for 10 weeks. Initial body weights of all mice were equivalent. Letters that do not match indicate statistical significance ( $p < 0.05$ ).
